# Supplementary material
Source: MDPI journal article supplement (https://www.mdpi.com/2304-6740/7/3/38)

# checkCIF/PLATON report

Structure factors have been supplied for datablock(s) CuL2, L1, L2

THIS REPORT IS FOR GUIDANCE ONLY. IF USED AS PART OF A REVIEW PROCEDURE FOR PUBLICATION, IT SHOULD NOT REPLACE THE EXPERTISE OF AN EXPERIENCED CRYSTALLOGRAPHIC REFEREE.

No syntax errors found.      CIF dictionary      Interpreting this report

## Datablock: L1

---

|                 |                                                   |                    |
|-----------------|---------------------------------------------------|--------------------|
| Bond precision: | C-C = 0.0032 A                                    | Wavelength=0.71073 |
| Cell:           | a=12.2207(13)      b=8.2084(9)      c=14.7380(16) |                    |
|                 | alpha=90      beta=105.6968(19)      gamma=90     |                    |
| Temperature:    | 293 K                                             |                    |
|                 | Calculated                                        | Reported           |
| Volume          | 1423.3(3)                                         | 1423.3(3)          |
| Space group     | P 21/c                                            | P 21/c             |
| Hall group      | -P 2ybc                                           | -P 2ybc            |
| Moiety formula  | C21 H13 N                                         | C21 H13 N          |
| Sum formula     | C21 H13 N                                         | C21 H13 N          |
| Mr              | 279.32                                            | 279.32             |
| Dx,g cm-3       | 1.304                                             | 1.304              |
| Z               | 4                                                 | 4                  |
| Mu (mm-1)       | 0.076                                             | 0.072              |
| F000            | 584.0                                             | 584.0              |
| F000'           | 584.21                                            |                    |
| h,k,lmax        | 15,10,19                                          | 15,10,19           |
| Nref            | 3279                                              | 3274               |
| Tmin,Tmax       | 0.985,0.999                                       | 0.454,0.744        |
| Tmin'           | 0.972                                             |                    |

Correction method= # Reported T Limits: Tmin=0.454 Tmax=0.744  
AbsCorr = MULTI-SCAN

Data completeness= 0.998      Theta(max)= 27.531

R(reflections)= 0.0543( 1561)      wR2(reflections)= 0.1669( 3274)

S = 0.986      Npar= 199

---

The following ALERTS were generated. Each ALERT has the format  
**test-name\_ALERT\_alert-type\_alert-level.**  
Click on the hyperlinks for more details of the test.

---

### ● Alert level C

ABSMU01\_ALERT\_1\_C The ratio of given/expected absorption coefficient lies  
outside the range 0.99 <> 1.01  
Calculated value of mu = 0.076  
Value of mu given = 0.072

PLAT026\_ALERT\_3\_C Ratio Observed / Unique Reflections (too) Low .. 48% Check  
PLAT230\_ALERT\_2\_C Hirshfeld Test Diff for C9 --C10 . 5.5 s.u.  
PLAT905\_ALERT\_3\_C Negative K value in the Analysis of Variance ... -10.358 Report  
PLAT905\_ALERT\_3\_C Negative K value in the Analysis of Variance ... -1.095 Report  
PLAT978\_ALERT\_2\_C Number C-C Bonds with Positive Residual Density. 0 Info

---

### ● Alert level G

PLAT199\_ALERT\_1\_G Reported \_cell\_measurement\_temperature ..... (K) 293 Check  
PLAT200\_ALERT\_1\_G Reported \_diffrn\_ambient\_temperature ..... (K) 293 Check  
PLAT912\_ALERT\_4\_G Missing # of FCF Reflections Above STh/L= 0.600 6 Note

---

0 **ALERT level A** = Most likely a serious problem - resolve or explain  
0 **ALERT level B** = A potentially serious problem, consider carefully  
6 **ALERT level C** = Check. Ensure it is not caused by an omission or oversight  
3 **ALERT level G** = General information/check it is not something unexpected

3 ALERT type 1 CIF construction/syntax error, inconsistent or missing data  
2 ALERT type 2 Indicator that the structure model may be wrong or deficient  
3 ALERT type 3 Indicator that the structure quality may be low  
1 ALERT type 4 Improvement, methodology, query or suggestion  
0 ALERT type 5 Informative message, check

---

## Datablock: L2

---

Bond precision: C-C = 0.0024 Å Wavelength=0.71073

Cell: a=8.2054(10) b=9.7248(12) c=10.4571(12)  
alpha=85.133(2) beta=79.400(2) gamma=74.341(2)

Temperature: 296 K

|                | Calculated  | Reported    |
|----------------|-------------|-------------|
| Volume         | 789.21(16)  | 789.21(16)  |
| Space group    | P -1        | P -1        |
| Hall group     | -P 1        | -P 1        |
| Moiety formula | C23 H17 N   | C23 H17 N   |
| Sum formula    | C23 H17 N   | C23 H17 N   |
| Mr             | 307.38      | 307.38      |
| Dx,g cm-3      | 1.293       | 1.293       |
| Z              | 2           | 2           |
| Mu (mm-1)      | 0.075       | 0.075       |
| F000           | 324.0       | 324.0       |
| F000'          | 324.11      |             |
| h,k,lmax       | 10,12,13    | 10,12,13    |
| Nref           | 3511        | 3494        |
| Tmin,Tmax      | 0.982,0.994 | 0.681,0.746 |
| Tmin'          | 0.963       |             |

Correction method= # Reported T Limits: Tmin=0.681 Tmax=0.746  
AbsCorr = MULTI-SCAN

Data completeness= 0.995                      Theta(max)= 27.140

R(reflections)= 0.0494( 2140)      wR2(reflections)= 0.1530( 3494)

S = 1.042                      Npar= 236

The following ALERTS were generated. Each ALERT has the format

```
test-name ALERT alert-type alert-level.
```

Click on the hyperlinks for more details of the test.

- Alert level C

|                   |                                                  |     |         |       |           |
|-------------------|--------------------------------------------------|-----|---------|-------|-----------|
| PLAT230_ALERT_2_C | Hirshfeld Test Diff for                          | N1  | --C21   | .     | 5.5 s.u.  |
| PLAT230_ALERT_2_C | Hirshfeld Test Diff for                          | C20 | --C21   | .     | 5.5 s.u.  |
| PLAT410_ALERT_2_C | Short Intra H...H Contact                        | H13 | ..H18D  | .     | 1.97 Ang. |
|                   |                                                  |     | x,y,z = | 1_555 | Check     |
| PLAT978_ALERT_2_C | Number C-C Bonds with Positive Residual Density. |     |         |       | 0 Info    |

- Alert level G

|                   |                                                  |              |
|-------------------|--------------------------------------------------|--------------|
| PLAT154_ALERT_1_G | The s.u.'s on the Cell Angles are Equal ..(Note) | 0.002 Degree |
| PLAT301_ALERT_3_G | Main Residue Disorder .....(Resd 1 )             | 8% Note      |
| PLAT912_ALERT_4_G | Missing # of FCF Reflections Above STH/L= 0.600  | 17 Note      |

- ```
0 ALERT level A = Most likely a serious problem - resolve or explain
0 ALERT level B = A potentially serious problem, consider carefully
4 ALERT level C = Check. Ensure it is not caused by an omission or oversight
3 ALERT level G = General information/check it is not something unexpected

1 ALERT type 1 CIF construction/syntax error, inconsistent or missing data
```

4 ALERT type 2 Indicator that the structure model may be wrong or deficient  
1 ALERT type 3 Indicator that the structure quality may be low  
1 ALERT type 4 Improvement, methodology, query or suggestion  
0 ALERT type 5 Informative message, check

---

## Datablock: CuL2

---

Bond precision: C-C = 0.0038 Å                      Wavelength=0.71073

Cell:                      a=20.4752(9)              b=4.5020(2)              c=20.2080(9)  
                            alpha=90              beta=103.158(1)              gamma=90

Temperature:              296 K

|                | Calculated     | Reported       |
|----------------|----------------|----------------|
| Volume         | 1813.86(14)    | 1813.85(14)    |
| Space group    | P 21/c         | P 21/c         |
| Hall group     | -P 2ybc        | -P 2ybc        |
| Moiety formula | C23 H17 Cu I N | C23 H17 Cu I N |
| Sum formula    | C23 H17 Cu I N | C23 H17 Cu I N |
| Mr             | 497.83         | 497.82         |
| Dx,g cm-3      | 1.823          | 1.823          |
| Z              | 4              | 4              |
| Mu (mm-1)      | 2.912          | 2.912          |
| F000           | 976.0          | 976.0          |
| F000'          | 975.64         |                |
| h,k,lmax       | 30,6,30        | 30,6,29        |
| Nref           | 6440           | 6174           |
| Tmin,Tmax      | 0.598,0.865    | 0.593,0.746    |
| Tmin'          | 0.357          |                |

Correction method= # Reported T Limits: Tmin=0.593 Tmax=0.746  
AbsCorr = MULTI-SCAN

Data completeness= 0.959                      Theta(max)= 32.255

R(reflections)= 0.0333( 4762)              wR2(reflections)= 0.0844( 6174)

S = 1.023                      Npar= 235

---

The following ALERTS were generated. Each ALERT has the format  
**test-name\_ALERT\_alert-type\_alert-level.**  
Click on the hyperlinks for more details of the test.

---

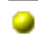

### Alert level C

|                                                                   |           |
|-------------------------------------------------------------------|-----------|
| PLAT241_ALERT_2_C High 'MainMol' Ueq as Compared to Neighbors of  | Cu1 Check |
| PLAT790_ALERT_4_C Centre of Gravity not Within Unit Cell: Resd. # | 1 Note    |
| C23 H17 Cu I N                                                    |           |

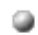**Alert level G**

|                   |                                                  |       |       |
|-------------------|--------------------------------------------------|-------|-------|
| PLAT004_ALERT_5_G | Polymeric Structure Found with Maximum Dimension | 1     | Info  |
| PLAT232_ALERT_2_G | Hirshfeld Test Diff (M-X) I1 --Cul .             | 41.3  | s.u.  |
| PLAT232_ALERT_2_G | Hirshfeld Test Diff (M-X) I1 --Cul_a .           | 65.3  | s.u.  |
| PLAT232_ALERT_2_G | Hirshfeld Test Diff (M-X) I1 --Cul_b .           | 211.7 | s.u.  |
| PLAT764_ALERT_4_G | Overcomplete CIF Bond List Detected (Rep/Expd) . | 1.13  | Ratio |
| PLAT910_ALERT_3_G | Missing # of FCF Reflection(s) Below Theta(Min). | 1     | Note  |
| PLAT912_ALERT_4_G | Missing # of FCF Reflections Above STh/L= 0.600  | 255   | Note  |
| PLAT933_ALERT_2_G | Number of OMIT Records in Embedded .res File ... | 1     | Note  |
| PLAT978_ALERT_2_G | Number C-C Bonds with Positive Residual Density. | 14    | Info  |

- 
- 0 **ALERT level A** = Most likely a serious problem - resolve or explain  
 0 **ALERT level B** = A potentially serious problem, consider carefully  
 3 **ALERT level C** = Check. Ensure it is not caused by an omission or oversight  
 9 **ALERT level G** = General information/check it is not something unexpected
- 0 ALERT type 1 CIF construction/syntax error, inconsistent or missing data  
 7 ALERT type 2 Indicator that the structure model may be wrong or deficient  
 1 ALERT type 3 Indicator that the structure quality may be low  
 3 ALERT type 4 Improvement, methodology, query or suggestion  
 1 ALERT type 5 Informative message, check
- 

It is advisable to attempt to resolve as many as possible of the alerts in all categories. Often the minor alerts point to easily fixed oversights, errors and omissions in your CIF or refinement strategy, so attention to these fine details can be worthwhile. In order to resolve some of the more serious problems it may be necessary to carry out additional measurements or structure refinements. However, the purpose of your study may justify the reported deviations and the more serious of these should normally be commented upon in the discussion or experimental section of a paper or in the "special\_details" fields of the CIF. checkCIF was carefully designed to identify outliers and unusual parameters, but every test has its limitations and alerts that are not important in a particular case may appear. Conversely, the absence of alerts does not guarantee there are no aspects of the results needing attention. It is up to the individual to critically assess their own results and, if necessary, seek expert advice.

### Publication of your CIF in IUCr journals

A basic structural check has been run on your CIF. These basic checks will be run on all CIFs submitted for publication in IUCr journals (*Acta Crystallographica*, *Journal of Applied Crystallography*, *Journal of Synchrotron Radiation*); however, if you intend to submit to *Acta Crystallographica Section C* or *E* or *IUCrData*, you should make sure that full publication checks are run on the final version of your CIF prior to submission.

### Publication of your CIF in other journals

Please refer to the *Notes for Authors* of the relevant journal for any special instructions relating to CIF submission.

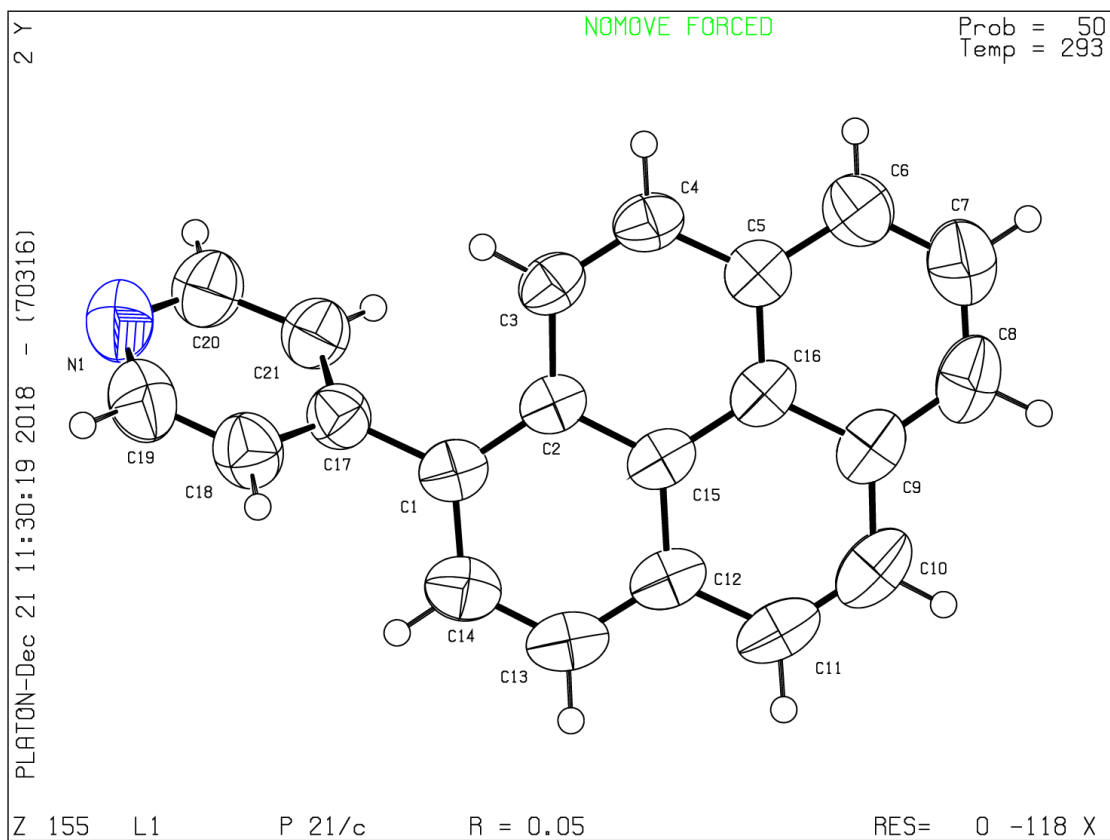

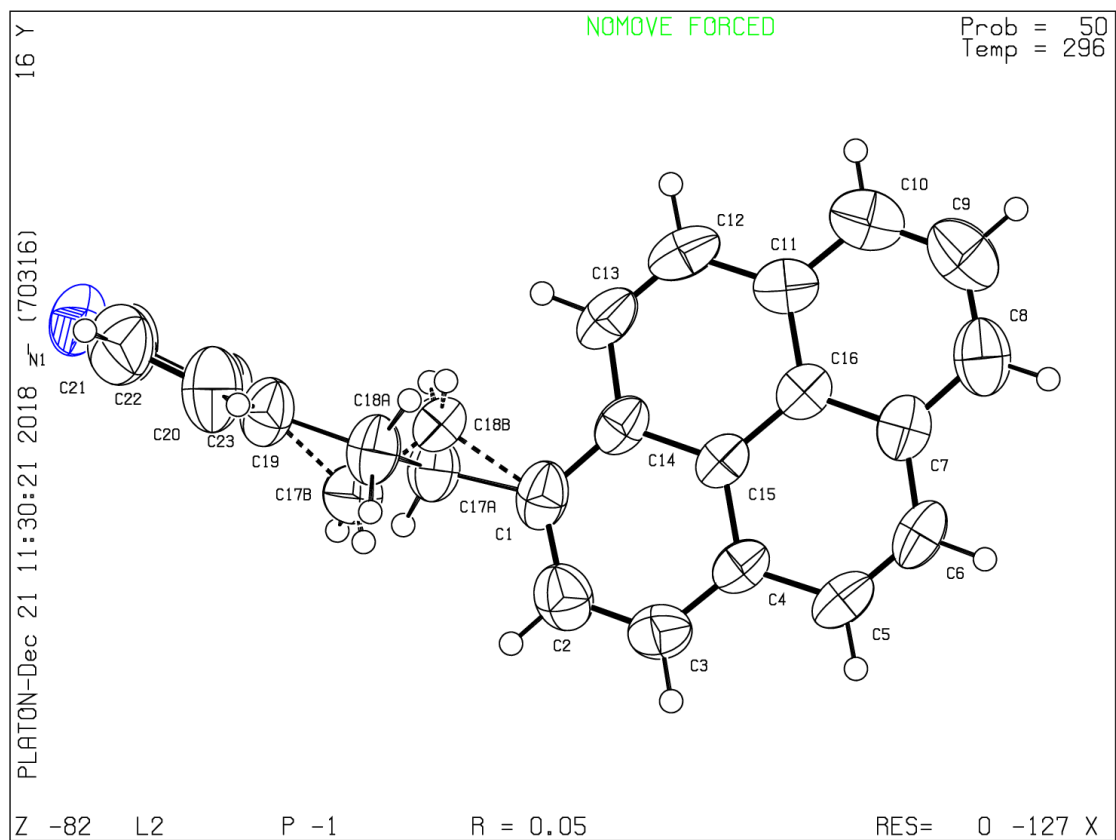

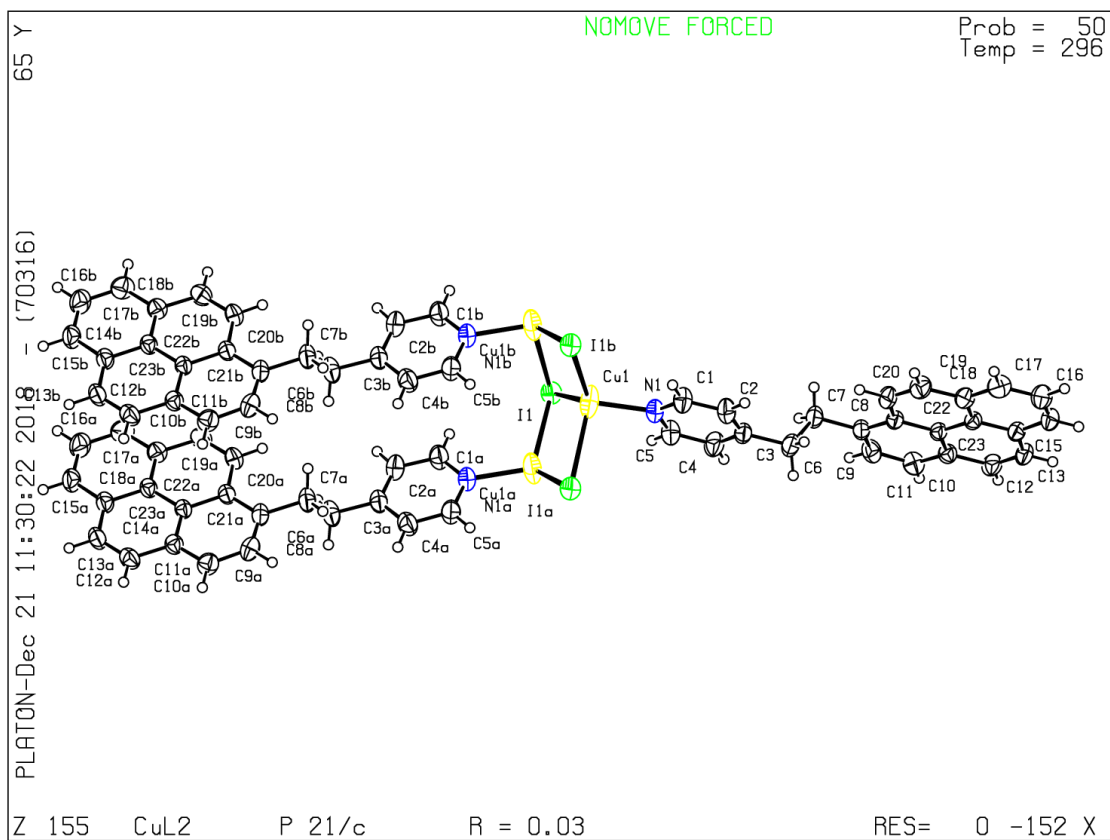

Supplement: s1 [file s1]
